# 1 Coronary artery disease risk and lipidomic 2 profiles are similar in familial and 3 population-ascertained hyperlipidemias

4 Joel T. Rämö<sup>1</sup>, Pietari Ripatti<sup>1</sup>, Rubina Tabassum<sup>1</sup>, Sanni Söderlund<sup>2</sup>, Niina Matikainen<sup>2,3</sup>, Mathias J.  
5 Gerl<sup>4</sup>, Christian Klose<sup>4</sup>, Athan O. Stitzel<sup>5,6,7</sup>, Aki S. Havulinna<sup>1,8</sup>, Veikko Salomaa<sup>8</sup>, Nelson B. Freimer<sup>9</sup>,  
6 Matti Jauhiainen<sup>8,10</sup>, Aarno Palotie<sup>1,11,12</sup>, Marja-Riitta Taskinen<sup>2</sup>, Kai Simons<sup>4,13</sup>, and Samuli Ripatti<sup>1,11,14</sup>

7 <sup>1</sup>Institute for Molecular Medicine Finland (FIMM), HiLIFE, University of Helsinki, Helsinki, Finland; <sup>2</sup>Research Programs  
8 Unit, Diabetes & Obesity, University of Helsinki and Department of Internal Medicine, Helsinki University Hospital, Helsinki,  
9 Finland; <sup>3</sup>Endocrinology, Abdominal Center, Helsinki University Hospital, Helsinki, Finland; <sup>4</sup>Lipotype GmbH, Dresden,  
10 Germany; <sup>5</sup>Cardiovascular Division, Department of Medicine, Washington University School of Medicine, Saint Louis, MO,  
11 USA; <sup>6</sup>Department of Genetics, Washington University School of Medicine, Saint Louis, MO, United States of America;  
12 <sup>7</sup>McDonnell Genome Institute, Washington University School of Medicine, Saint Louis, MO, United States of America;  
13 <sup>8</sup>National Institute for Health and Welfare, Helsinki, Finland; <sup>9</sup>Center for Neurobehavioral Genetics, Semel Institute for  
14 Neuroscience and Human Behavior, University of California, Los Angeles, California, USA; <sup>10</sup>Minerva Foundation Institute  
15 for Medical Research, Biomedicum, Helsinki, Finland; <sup>11</sup>Program in Medical and Population Genetics and The Stanley Center  
16 for Psychiatric Research, The Broad Institute of MIT and Harvard, Cambridge, Massachusetts, USA; <sup>12</sup>Psychiatric &  
17 Neurodevelopmental Genetics Unit, Department of Psychiatry, Analytic and Translational Genetics Unit, Department of  
18 Medicine, and the Department of Neurology, Massachusetts General Hospital, Boston, Massachusetts, USA; <sup>13</sup>Max Planck  
19 Institute of Cell Biology and Genetics, Dresden, Germany; <sup>14</sup>Department of Public Health, Clinicum, Faculty of Medicine,  
20 Helsinki, Finland

21 **Corresponding author:** Prof. Samuli Ripatti. Address: Institute for Molecular Medicine Finland (FIMM), PO Box  
22 20, FI-00014 University of Helsinki, Finland. Email: [samuli.ripatti@helsinki](mailto:samuli.ripatti@helsinki). Tel: +358 40 567 0826.

23 **Institutional affiliations:** Prof. Kai Simons is CEO and shareholder of Lipotype GmbH. Mathias J. Gerl and  
24 Christian Klose are employees of Lipotype GmbH.

## 25 **Abstract**

26 **Aims:** To characterize and compare coronary artery disease (CAD) risk and detailed lipidomic profiles  
27 of individuals with familial and population-ascertained hyperlipidemias.

28 **Methods and Results:** We determined incident CAD risk for 760 members of 66 hyperlipidemic  
29 families ( $\geq 2$  first degree relatives with the same hyperlipidemia) and 19,644 Finnish FINRISK  
30 population study participants. We also quantified 151 lipid species in plasma or serum samples from  
31 550 members of 73 hyperlipidemic pedigrees and 897 FINRISK participants using a mass spectrometric  
32 shotgun lipidomics platform. Hyperlipidemias (LDL-C or triacylglycerides over 90<sup>th</sup> population  
33 percentile) were associated with increased CAD risk (high LDL-C: HR 1.74, 95% CI 1.48–2.04; high  
34 triacylglycerides: HR 1.38, 95% CI 1.09–1.74) and the risk estimates were very similar between the  
35 family and population samples. High LDL-C was associated with altered levels of 105 lipid species in  
36 families ( $p$ -value range 0.033– $7.3 \times 10^{-20}$  at 5% false discovery rate) and 51 species in the population  
37 samples ( $p$ -value range 0.017– $6.8 \times 10^{-21}$ ). Hypertriglyceridemia was associated with altered levels of  
38 117 lipid species in families ( $p$ -value range 0.035– $1.8 \times 10^{-49}$ ) and 119 species in the population sample  
39 ( $p$ -value range 0.038– $2.3 \times 10^{-56}$ ). The lipidomics profiles of hyperlipidemias were highly similar in  
40 families and population samples.

41 **Conclusion:** We identified distinct lipidomic profiles associated with high LDL-C and triacylglyceride  
42 levels. CAD risk, lipidomic profiles and genetic profiles are highly similar between familial and  
43 population-ascertained hyperlipidemias, providing evidence of similar and overlapping underlying  
44 mechanisms. Our results do not support different screening and treatment for such hyperlipidemias.

45 **Keywords:** coronary artery disease; hyperlipidemia; low-density lipoprotein cholesterol; triglycerides,  
46 lipids; family study

## 47 **Introduction**

48 High levels of low-density lipoprotein cholesterol (LDL-C) and triacylglycerides (TGs) have been  
49 identified as causal risk factors for atherosclerotic cardiovascular disease (ASCVD).<sup>1, 2</sup> These  
50 hyperlipidemias may arise through lifestyle factors, but they are also highly heritable.<sup>3-6</sup> More than half  
51 of patients with premature coronary artery disease (CAD) may be affected by familial dyslipidemias, a  
52 majority of which are characterized by elevations in LDL-C and/or TGs.<sup>7</sup>

53 Whether familial hyperlipidemias should be diagnosed and managed differently from  
54 hyperlipidemias observed in randomly ascertained individuals in the general population is uncertain.  
55 Carriers of rare high-impact variants predisposing to familial hypercholesterolemia (FH) may have a  
56 higher risk of developing coronary artery disease than non-carriers with similar lipid levels.<sup>8</sup> This is  
57 potentially related to lifelong exposure to high LDL-C levels and suggests that these individuals may  
58 benefit from earlier or more aggressive LDL-C-lowering therapy.

59 Rare variants, however, explain only a small fraction of familial hyperlipidemias with either  
60 elevated LDL-C or TG levels. Instead, there is growing evidence that familial hyperlipidemias are highly  
61 polygenic in origin.<sup>8-13</sup> It is of high clinical importance whether non-monogenic familial hyperlipidemias  
62 represent distinct disease entities and lead to different ASCVD susceptibility compared with population-  
63 ascertained hyperlipidemias.<sup>14</sup> A recent study provided suggestive evidence to the contrary, finding  
64 greater preclinical atherosclerosis in monogenic FH than in polygenic hypercholesterolemia.<sup>15</sup> However,  
65 it is unknown how these results translate to clinical outcomes between familial and population-  
66 ascertained hyperlipidemias.

67 How the heterogenic genetic background of familial hyperlipidemias manifests in detailed  
68 circulating lipid profiles, and reflects underlying pathophysiology, is also unknown. Recent  
69 technological advancements have allowed replicable and simultaneous quantification of hundreds of  
70 lipid species through lipidomic profiling.<sup>16, 17</sup> We tested whether precise phenotypic differences in  
71 lipidomic profiles, which might underlie differing ASCVD susceptibility, exist between familial and

72 population-ascertained hyperlipidemias after excluding individuals with monogenic FH. We looked  
73 beyond the traditional clinical measures of LDL-C and TG concentrations at the numerous fatty acid  
74 ester species of TGs and cholesterol species which are the major constituents of LDL and TG-rich  
75 lipoprotein particles. We used a direct infusion platform that combines absolute quantification with high  
76 throughput, overcoming problems that have hampered many previous studies.<sup>18</sup>

77 Lipid species including sphingolipids, glycerophospholipids, glycerolipids and cholesteryl  
78 esters may predict ASCVD incidence or event risk over traditional risk factors, and the levels of many  
79 individual lipid species have been linked to distinct genetic loci.<sup>19-22</sup> Major differences in the metabolic  
80 pathways underlying different types of hyperlipidemias would thus be expected to be reflected in  
81 different lipidomic profiles. As an example, individuals with low HDL-C levels have previously been  
82 shown to have low phosphatidylethanolamine-plasmalogen levels in HDL particles, a marker of HDL  
83 anti-oxidative capacity.<sup>23</sup>

84 In the present study, we first estimated the CAD risk associated with familial and population-  
85 ascertained hyperlipidemias. Secondly, we characterized the lipidomic profiles associated with elevated  
86 plasma levels of LDL-C and TGs. Finally, we compared the lipidomic profiles of familial and  
87 population-ascertained hyperlipidemias to assess their potential differences.

## 88 **Materials and Methods**

### 89 **Subjects and clinical ascertainment**

90 The Finnish hyperlipidemia families included in this cohort study (74 families,  $n = 1,445$  individuals  
91 with at least LDL-C and TG measures) were identified as part of The European Multicenter Study on  
92 Familial Dyslipidemias in Patients with Premature Coronary Heart Disease (EUFAM). Designation of  
93 “familial high LDL-C” or “familial high TGs” was made if at least two first-degree relatives of each  
94 other had LDL-C or TG levels, respectively, that were  $> 90^{\text{th}}$  age- and sex-specific Finnish 1997  
95 population percentiles (Supplemental Table IV). Classic familial hypercholesterolemia (FH) was  
96 excluded based on genotyping and an in-house functional low-density lipoprotein receptor test.

97 Samples from the Finnish National FINRISK study were used as a Finnish population-based  
98 comparison group. 19,644 individuals from the FINRISK 1992-2002 cohorts and 755 individuals from  
99 EUFAM families passed exclusion criteria and could be linked with the national hospital discharge and  
100 causes-of-death registries. Clinical incident CAD event endpoints were defined as either myocardial  
101 infarction or coronary revascularization (coronary angioplasty or coronary artery bypass grafting). Mean  
102 (range) follow-up time from baseline to CAD endpoint, death, or end of registry follow-up was 16.1  
103 (0.1–20.1) years in EUFAM and 12.6 (0.02–19.0) years in FINRISK. More detailed information is given  
104 in the Supplementary material online.

### 105 **Lipidomics measurements**

106 Lipidomic profiling and analysis of circulating lipid species was performed for 550 EUFAM family  
107 members with available plasma samples and for 897 individuals from the FINRISK 2012 cohort. Mass  
108 spectrometry-based lipid analysis was performed at Lipotype GmbH (Dresden, Germany) as  
109 described.<sup>16</sup> Plasma and serum lipids were extracted with methyl tert-butyl ether/methanol (7:2, V:V)  
110 as in Matyash et al.<sup>24</sup> Samples were analyzed by direct infusion in a QExactive mass spectrometer  
111 (Thermo Scientific) equipped with a TriVersa NanoMate ion source (Advion Biosciences). Samples  
112 were analyzed in both positive and negative ion modes in a single acquisition.

113 Data were analyzed with in-house developed lipid identification software based on  
114 LipidXplorer.<sup>25, 26</sup> Reproducibility was assessed by the inclusion of reference plasma samples. Median  
115 coefficient of variation was <10% across all batches. A total of 151 species were detected in  $\geq 80\%$  of  
116 both EUFAM and FINRISK samples and were included in the subsequent analyses. Right-skewed  
117 lipidomics measures were natural logarithm transformed prior to normalization by standard deviation.  
118 More detailed information is given in the Supplementary material online.

### 119 **Statistical analyses**

120 To assess the risk of incident coronary artery disease associated with the hyperlipidemias, we used Cox  
121 proportional hazards models using age as the time scale, stratified by sex, and clustered by family to  
122 estimate hazard ratios (HR) for incident CAD events, excluding individuals with prevalent CAD.

123 We used linear mixed models to estimate the association between lipidomic parameters and  
124 predictors of interest (hyperlipidemia status, continuous lipid measurement, or genotype) as  
125 implemented in MMM (version 1.01).<sup>27</sup> Age, age<sup>2</sup>, and sex were used as additional fixed effect  
126 covariates. To account for relatedness among individuals, an empirical genetic relationship matrix was  
127 included as the covariance structure of a random effect. Statistical significance was evaluated using the  
128 Benjamini-Hochberg method at the 5% level to account for multiple comparisons. R (version 3.4.3) was  
129 used for data transformations and other analyses.<sup>28</sup> Detailed information is given in the Supplementary  
130 material online.

## 131 **Methods**

### 132 **Clinical characteristics and CAD risk of individuals with high levels of LDL-C or TGs**

133 We first assessed the risk of developing CAD associated with high levels of LDL-C or TGs in  
134 individuals from the Finnish FINRISK population survey and in hyperlipidemic pedigrees ascertained  
135 as part of the European Study of Familial Hyperlipidemias (EUFAM) (Table 1; Supplemental Table I;  
136 Supplemental Figure I.A.). Individuals with high LDL-C had an increased risk of being diagnosed with  
137 CAD in the FINRISK population surveys ( $n = 19,644$  individuals) compared to other individuals (HR  
138 1.74; 95% CI 1.48–2.05). The members of hyperlipidemic families with high LDL-C had a similar  
139 though nonsignificant HR compared to their relatives without high LDL-C in 47 “high LDL-C” families  
140 ( $n = 633$  individuals) (HR 1.71; 95% CI 0.94–3.10). The HRs did not differ between the cohorts  
141 ( $p=0.60$ ). We also observed an increased CAD risk in individuals with high TGs in the population (HR  
142 1.38; 95% CI 1.08–1.75), and a similar though nonsignificant HR in 35 “high TG” families ( $n = 375$   
143 individuals) (HR 1.35; 95% CI 0.52–3.51). The HRs did not differ between the cohorts ( $p=0.91$ ). Meta-  
144 analyses of HRs closely approximated estimates derived in the population cohort.

#### 145 *Position of Table 1*

146 We then characterized the detailed lipidomic profiles of 550 individuals from 73 hyperlipidemic

147 families and 897 individuals from the FINRISK population study (Methods; Supplemental Table II;  
148 Supplemental Figure I.B.). These included 105 individuals (23 %) out of 463 family members in 53  
149 “high LDL-C” families who had LDL-C levels >90<sup>th</sup> percentile (mean  $\pm$  SE  $5.2 \pm 0.8$  mmol/l), and 64  
150 individuals (22 %) out of 287 family members in 39 “high TG” families who had TGs >90<sup>th</sup> percentile  
151 ( $3.6 \pm 2.0$  mmol/l). Using similar cutoffs in the population, 56 individuals (6 %) and 65 individuals (7  
152 %) out of 897 individuals were affected by high LDL-C levels ( $5.3 \pm 1.1$  mmol/l) and high TGs ( $3.5 \pm$   
153  $1.6$  mmol/l) respectively. Simultaneously high LDL-C and TG levels were observed in 31 individuals  
154 in the family samples and 9 individuals in the population samples.

### 155 **High LDL-C and lipidomic profiles**

156 To characterize the lipidomic profiles associated with elevated values of LDL-C, we compared  
157 individuals with high LDL-C levels vs. those without. In the hyperlipidemic families, individuals with  
158 high LDL-C had significantly elevated levels of 99 lipid species spread out across most of the studied  
159 lipid classes. Reduced levels were observed for three lysophosphatidylcholine (LPC), two  
160 lysophosphatidylethanolamine (LPE) and one phosphatidylcholine-ether (PCO) species (Figure 1.A.;  
161 Supplemental Table III). Similar trends were seen in the population when comparing individuals with  
162 high LDL-C vs. those without. We observed significantly elevated levels of 51 lipid species (Figure  
163 1.B.; Supplemental Table III). The effect estimates correlated strongly across all lipid species between  
164 the hyperlipidemic families and the population cohorts (Pearson’s  $r = 0.80$ ; Figure 3). Further, we  
165 observed no statistically significant cohort-dyslipidemia interactions at the 5% false discovery rate.

### 166 *Position of Figure 1*

167 We also studied the association of high LDL-C levels with the degree of saturation of fatty acids  
168 in each lipid class. In the hyperlipidemic families, high LDL-C levels were associated with increased  
169 saturation of LPCs and ceramides, as well as reduced saturation of LPEs, PCs, phosphatidylcholine-  
170 ethers (PCOs), and phosphatidylinositols (PIs) ( $p$ -value range = 0.019–0.0014) (Supplemental Figure  
171 II). In the population samples, the trends were similar, although there was an association for increased  
172 LPC saturation only ( $p=7.2*10^{-4}$ ). There were no cohort-hyperlipidemia interactions in any of the lipid

173 species at the 5% false discovery rate. Overall, the lipidomic profiles associated with high LDL-C levels  
174 appeared similar in the hyperlipidemic families and the general population.

### 175 **High TGs and lipidomic profiles**

176 In the hyperlipidemic families, individuals with high TGs had elevated levels of 107 lipid species  
177 covering all studied lipid classes with the exception of LPEs. In addition, we observed reduced levels  
178 of seven PCO, two LPC, and one PI species (Figure 2.A.; Supplemental Table III). Similar profiles were  
179 seen in the population when comparing individuals with high TGs vs. those without. We observed  
180 elevated levels of 108 species and reduced levels of ten PCO and one LPC species (Figure 2.B.;  
181 Supplemental Table III). The effect estimates correlated very highly across all species between families  
182 and population samples (Pearson's  $r = 0.96$ ; Figure 3). Further, we observed no cohort-dyslipidemia  
183 interactions for any of the lipid species at the 5% false discovery rate.

184 *Position of Figure 2*

185 *Position of Figure 3*

186 Next, we studied the association of high TG levels with the degree of saturation of fatty acids in each  
187 lipid class. In both the hyperlipidemic families and the population, having high TGs was significantly  
188 associated with increased saturation of TGs, DGs, LPCs, and CEs ( $p$ -value range =  $0.0012$ – $5.9 \times 10^{-11}$ )  
189 (Supplemental Figure III). There were no statistically significant cohort-hyperlipidemia interactions at  
190 the 5% false discovery rate. Overall, we observed great similarity in the lipidomic profiles associated  
191 with high TGs in the hyperlipidemic families and in the general population.

### 192 **Independent associations of LDL-C and TG values with the lipid species**

193 Since we observed modest combined hyperlipidemia in both cohorts, we estimated the independent  
194 associations of LDL-C and TGs with each lipid species in co-adjusted models (Figure 4; Supplemental  
195 Table III). In these analyses, many of the observed associations with LDL-C were greatly diluted in  
196 magnitude. LDL-C levels remained most strongly associated with CE, SM, ceramide, PC and PCO



197 species in both cohorts. A total of 83 species in the hyperlipidemic families and 91 species in the  
198 population were independently associated with LDL-C at the 5% false discovery rate. In contrast, TGs  
199 remained strongly associated with a wide range of lipid species, including all individual TG species,  
200 DGs, PCs, PEs, PIs, ceramides and a subset of CEs in both cohorts. A total of 125 species in the  
201 hyperlipidemic families and 124 species in the population were independently associated with TGs at  
202 the 5% false discovery rate. Overall, only 13 species were uniquely associated with LDL-C in either  
203 cohort, whereas 42 species were uniquely associated with TGs (Supplemental Figure IV).

204 *Position of Figure 4*

## 205 **Discussion**

206 Recent lipidomic approaches have identified several hundreds of different lipid species in the human  
207 circulation, some of which could be better prognostic biomarkers for atherosclerotic cardiovascular  
208 disease than the traditional clinical chemistry measurements. To the best of our knowledge, the present  
209 study is the most comprehensive lipidomic profiling of common hyperlipidemias to date. We used a  
210 mass spectrometric lipidomics platform to assess the lipidomic profiles in individuals with high LDL-C  
211 and/or TG levels. We found that individuals affected by high levels of LDL-C or TGs had CAD HRs  
212 between 1.34–1.74 in the family and population cohorts and exhibited distinct lipidomic profiles with  
213 clear variation between lipid classes. In total, out of 151 lipidomic species, 108 were significantly  
214 associated with high LDL-C and 131 with high TG levels in at least one cohort. Of these, 96 species  
215 were common with both high LDL-C and TGs. In addition, we observed highly similar lipidomic  
216 profiles between the familial and population-ascertained hyperlipidemias.

217 These findings allow us to draw several conclusions. First, the CAD risks are highly similar  
218 regardless of whether hyperlipidemic individuals were identified from families with a high prevalence  
219 of hyperlipidemia or from the general population. This result contrasts with earlier results reporting  
220 much higher CAD risks in relatives of familial combined hyperlipidemia probands compared to  
221 spouses.<sup>29</sup> Our study, however, compares the estimates between family members to individuals with

222 closely similar lipid levels from the population to isolate the effect of familiarity. We also study the risk  
223 associated with elevated LDL-C and TGs separately. Our estimates are also lower than typically reported  
224 for monogenic FH, which may be associated with lifelong exposure to very high LDL-C levels and  
225 increased CAD risk compared with other individuals with similarly extreme hyperlipidemias.<sup>8</sup> In the  
226 present study, we excluded probands with monogenic FH based on a functional LDL receptor test.  
227 Excepting monogenic FH, familial hyperlipidemias with high LDL-C and/or TG levels have been  
228 reported to be highly polygenic.<sup>9, 10, 13, 30</sup> The pleiotropic effects of diverse genes, in contrast with the  
229 single affected pathway in monogenic FH, may partly explain why we did not observe increased CAD  
230 risk due to familiarity in our study.

231         Second, to more deeply characterize potential differences between familial and population-  
232 ascertained hyperlipidemias, we performed precise phenotyping of circulating lipid species known to  
233 be associated with ASCVD risk.<sup>20-22</sup> We first characterized the lipid profiles associated with high LDL-  
234 C and TG levels. Many of the associations were not specific to LDL-C but rather due to combined  
235 dyslipidemia. LDL particles are generated in circulation as downstream metabolic products from the  
236 TG-enriched lipoproteins (liver-derived VLDL particles and their post-lipolytic remnants) by the action  
237 of two lipases, lipoprotein lipase and hepatic lipase.<sup>31,32</sup> Thus, a proportion of the core lipids—especially  
238 cholesterol esters—and the particle surface phospholipids are retained within the generated LDL  
239 particles. The actions of the cholesteryl ester transfer protein and phospholipid transfer protein further  
240 modulate the constituents of TG-rich and LDL particles.<sup>33</sup> Percentual lipid compositions have been  
241 reported for different lipoprotein classes, but they do not directly reflect variation in plasma LDL-C or  
242 TG concentrations. For example, PCs have been estimated to constitute 12 % of all lipids in LDL  
243 particles vs. 3–9% in TG-rich lipoproteins.<sup>34</sup> However, in our study, PCs were overall more strongly  
244 associated with TG levels than with LDL-C levels. Nevertheless, LDL-C remained positively associated  
245 with a range of species including CEs, ceramides, SMs, PCs and PCOs. Among the strongly increased  
246 species, CE(14:0), CE(16:0), CE(16:1), CE(18:0), SM(34:1;2), SM(34:2;2), SM(42:2;2), Cer(42:1;2),  
247 and Cer(42:2;2) have previously been associated with the risk of future ASCVD incidence or events.<sup>20,</sup>

248 <sup>21</sup>

249 Elevated TG levels were associated with either increases or decreases in the levels of lipid  
250 species across most classes. Importantly, most of these associations appeared to be independent of LDL-  
251 C levels. Among the lipid species that were strongly correlated with high TGs even after correction for  
252 LDL-C levels were several species which have previously been associated with risk of ASCVD  
253 incidence or events.<sup>20-22</sup> These include the species CE(14:0), CE(16:0), CE(16:1), CE(18:0), TG(50:1),  
254 TG(50:2), TG(50:3), TG(52:2), TG(52:3), TG(52:5), TG(56:5), TG(56:6), Cer(42:1;2) and Cer(42:2;2).  
255 Further, high TGs were associated with increased saturation of fatty acids in the TG, DG, CE and LPC  
256 classes. Such differences in the relative concentrations of circulating fatty acids can be partly related to  
257 dietary intake, but are also influenced by endogenous metabolism.<sup>35</sup>

258 Overall, a larger proportion of the lipid species previously linked with increased ASCVD risk  
259 were strongly associated with elevated TGs rather than with elevated LDL-C. This interesting  
260 observation suggests that the levels of these lipid biomarkers are more closely linked with circulating  
261 TG-rich lipoprotein metabolism than with low-density lipoproteins.

262 Third, several lipid species, such as specific cholesteryl esters, ceramides, and  
263 phosphatidylcholine-ethers, remained independently associated with both elevated LDL-C and TGs.  
264 Among these species, the ceramides Cer(42:1;2) (presumably Cer(d18:1/24:0)) and Cer(42:2;2)  
265 (presumably Cer(d18:1/24:1)), the sterol esters CE(16:1) and CE(18:0), and the sphingomyelin  
266 SM(34:1;2) may have added value in the prediction of ASCVD incidence or event risk over traditional  
267 lipid measurements.<sup>20-22</sup> Plasma ceramides have been reported to be independent predictors of  
268 cardiovascular events in addition to LDL-C in the population and in CAD patients.<sup>22, 36, 37</sup> Both LDL-C  
269 and TGs remained independently associated with all four ceramides quantified in our study, and LDL-  
270 C was additionally associated with increased saturation degree of ceramides. Unlike most CE species,  
271 CE(16:1) was more strongly associated with the concentration of TGs than with LDL-C concentration  
272 in our study. SM(34:1;2) was the only sphingomyelin species which was negatively associated with TGs  
273 – and this association became evident only after adjusting for LDL-C levels. Additionally, some species,  
274 such as Cer(42:1;2) and TG(56:6), which were positively associated with hyperlipidemias in our sample,  
275 have previously been reported to be associated with decreased risk of ASCVD events.<sup>20, 22</sup> These co-

276 associations and discordances between reported associations might explain why some lipid species can  
277 improve risk prediction. Consequently, there is an urgent need for a better understanding of the potential  
278 underlying signaling and metabolic pathways.

279 Finally, the lipidomic profiles associated with high LDL-C or TG levels were comparable  
280 between familial and population-ascertained hyperlipidemias. We observed no differences in either the  
281 levels of individual lipid species or the saturation of fatty acids within lipid classes. Our results support  
282 the hypothesis that familial and population-ascertained hyperlipidemias have similar, overlapping, and  
283 heterogeneous pathophysiology. Our results are also reassuring for the quality of lipidomics studies  
284 which combine familial and population-based hyperlipidemic samples to increase statistical power.

285 Although we present the most comprehensive characterization of coronary artery disease risk  
286 and circulating lipid species in common familial hyperlipidemias to date, our study has some limitations.  
287 The confidence intervals for CAD risk were relatively large in the family samples. The field of  
288 lipidomics is still relatively young, and concerns have been raised regarding the replicability of  
289 individual lipidomics platforms. The platform used here overcomes these problems by profiting from  
290 the advantages of direct infusion mass spectrometry for high throughput screening studies. We also  
291 observed similar lipidomic profiles associated with hyperlipidemia in two independent cohorts,  
292 supporting the replicability of the platform. Further, the lipid species included in our analyses are  
293 strongly associated with known genetic lipid loci (Supplemental Figures V–VIII). We profiled the whole  
294 circulating lipidome at once to capture variation across various lipoprotein classes and size distributions.  
295 However, this limits our ability to follow up on observed differences at the level of the individual  
296 lipoproteins. We excluded poorly captured lipid species from the analyses; future advances in lipidomics  
297 technology might enable their detection. It is unclear how well our results can be generalized to other  
298 populations than Finns. Some of the individuals surveyed in population cohorts might in fact have  
299 familial hyperlipidemia; we could not fully rule out such cases. As this was a cross-sectional study,  
300 single LDL-C and TG measurements were used to establish hypercholesterolemia status. However,  
301 especially TGs are known to exhibit diurnal variability—especially in relation to dietary episodes with  
302 chylomicron entry—as well as variation over time periods of months to years.<sup>38-40</sup> In this study, the

303 samples from the hyperlipidemic families were fasting and the samples from the population cohort were  
304 semi-fasting. In this light, the similarity of lipidomic profiles between familial and population-  
305 ascertained hypertriglyceridemias becomes even more striking. Moreover, the most recent consensus  
306 statement from the European Atherosclerosis Society and European Federation of Clinical Chemistry  
307 and Laboratory Medicine recommends routine use of non-fasting blood samples for assessment of  
308 plasma lipid profiles.<sup>41</sup>

309 In conclusion, we observed distinct lipidomic profiles associated with high levels of LDL-C and  
310 TGs, but similar CAD risk and lipidomic profiles between common familial and population-ascertained  
311 hyperlipidemias, providing further evidence of similar and overlapping underlying mechanisms. The  
312 high degree of similarity between these familial dyslipidemic individuals and random population  
313 samples in their genomic and lipidomic profiles, and in elevated CAD risk, does not support different  
314 screening and treatment for familial and sporadic cases. Additional work is needed to confirm the  
315 validity of this hypothesis in clinical settings.

## 316 **Funding**

317 This work was supported by National Institutes of Health [grant number HL113315 to S.R., M.-R.T.,  
318 N.B.F, and A.P.]; Finnish Foundation for Cardiovascular Research [to S.R., V.S., M.-R.T., M.J., and  
319 A.P.]; Academy of Finland Center of Excellence in Complex Disease Genetics [grant number 213506  
320 and 129680 to S.R. and A.P.]; Academy of Finland [grant number 251217 and 285380 to S.R. and grant  
321 number 286500 to A.P.]; Jane and Aatos Erkko Foundation [to M.J.]; Sigrid Jusélius Foundation [to  
322 S.R., A.P., and M.-R.T.]; Biocentrum Helsinki [to S.R.]; Horizon 2020 Research and Innovation  
323 Programme [grant number 692145 to S.R.]; EU-project RESOLVE (EU 7th Framework Program) [grant  
324 number 305707 to M.-R.T.]; HiLIFE Fellowship [to S.R.]; Helsinki University Central Hospital  
325 Research Funds [to M.-R.T.]; Magnus Ehrnrooth Foundation [to M.J.]; Leducq Foundation [to M.-R.T.];  
326 Ida Montin Foundation [to P.R.]; MD-PhD Programme of the Faculty of Medicine, University of  
327 Helsinki [to J.T.R.]; Doctoral Programme in Population Health, University of Helsinki [to J.T.R. and

328 P.R.]; Finnish Medical Foundation [to J.T.R.]; Emil Aaltonen Foundation [to J.T.R. and P.R.];  
329 Biomedicum Helsinki Foundation [to J.T.R.]; Paulo Foundation [to J.T.R.]; Idman Foundation [to  
330 J.T.R.]; and Veritas Foundation [to J.T.R.]. The funders had no role in study design, data collection and  
331 analysis, decision to publish, or preparation of the manuscript.

## 332 **Acknowledgements**

333 We would like to thank Sari Kivikko, Huei-Yi Shen, and Ulla Tuomainen for management assistance.  
334 The FINRISK data used for the research were obtained from THL Biobank. We thank all study  
335 participants for their generous participation in the FINRISK and EUFAM studies.

## 336 **Conflicts of Interest**

337 K.S., C.K., and M.J.G. have paid employment at Lipotype GmbH. This does not alter the authors'  
338 adherence to all policies on sharing data and materials.

339

340

## 341 References

- 342 1. Ference BA, Ginsberg HN, Graham I, Ray KK, Packard CJ, Bruckert E, Hegele RA,  
343 Krauss RM, Raal FJ, Schunkert H, Watts GF, Boren J, Fazio S, Horton JD, Masana L, Nicholls  
344 SJ, Nordestgaard BG, van de Sluis B, Taskinen MR, Tokgozoglu L, Landmesser U, Laufs U,  
345 Wiklund O, Stock JK, Chapman MJ, Catapano AL. Low-density lipoproteins cause  
346 atherosclerotic cardiovascular disease. 1. Evidence from genetic, epidemiologic, and clinical  
347 studies. A consensus statement from the European Atherosclerosis Society Consensus Panel.  
348 *Eur Heart J* 2017;**38**(32):2459-2472.
- 349 2. Nordestgaard BG. Triglyceride-Rich Lipoproteins and Atherosclerotic Cardiovascular  
350 Disease: New Insights From Epidemiology, Genetics, and Biology. *Circ Res* 2016;**118**(4):547-  
351 63.
- 352 3. Yuan G, Al-Shali KZ, Hegele RA. Hypertriglyceridemia: its etiology, effects and  
353 treatment. *CMAJ* 2007;**176**(8):1113-20.
- 354 4. Berglund L, Brunzell JD, Goldberg AC, Goldberg IJ, Sacks F, Murad MH, Stalenhoef  
355 AF, Endocrine s. Evaluation and treatment of hypertriglyceridemia: an Endocrine Society  
356 clinical practice guideline. *J Clin Endocrinol Metab* 2012;**97**(9):2969-89.
- 357 5. Kathiresan S, Manning AK, Demissie S, D'Agostino RB, Surti A, Guiducci C, Gianniny  
358 L, Burt NP, Melander O, Orho-Melander M, Arnett DK, Peloso GM, Ordovas JM, Cupples LA.  
359 A genome-wide association study for blood lipid phenotypes in the Framingham Heart Study.  
360 *BMC Med Genet* 2007;**8 Suppl 1**:S17.
- 361 6. Weiss LA, Pan L, Abney M, Ober C. The sex-specific genetic architecture of  
362 quantitative traits in humans. *Nat Genet* 2006;**38**(2):218-22.
- 363 7. Genest JJ, Jr., Martin-Munley SS, McNamara JR, Ordovas JM, Jenner J, Myers RH,  
364 Silberman SR, Wilson PW, Salem DN, Schaefer EJ. Familial lipoprotein disorders in patients  
365 with premature coronary artery disease. *Circulation* 1992;**85**(6):2025-33.
- 366 8. Khera AV, Won HH, Peloso GM, Lawson KS, Bartz TM, Deng X, van Leeuwen EM,  
367 Natarajan P, Emdin CA, Bick AG, Morrison AC, Brody JA, Gupta N, Nomura A, Kessler T,  
368 Duga S, Bis JC, van Duijn CM, Cupples LA, Psaty B, Rader DJ, Danesh J, Schunkert H,  
369 McPherson R, Farrall M, Watkins H, Lander E, Wilson JG, Correa A, Boerwinkle E, Merlini PA,  
370 Ardissino D, Saleheen D, Gabriel S, Kathiresan S. Diagnostic Yield and Clinical Utility of  
371 Sequencing Familial Hypercholesterolemia Genes in Patients With Severe  
372 Hypercholesterolemia. *J Am Coll Cardiol* 2016;**67**(22):2578-89.
- 373 9. Ripatti P, Ramo JT, Soderlund S, Surakka I, Matikainen N, Pirinen M, Pajukanta P,  
374 Sarin AP, Service SK, Laurila PP, Ehnholm C, Salomaa V, Wilson RK, Palotie A, Freimer NB,  
375 Taskinen MR, Ripatti S. The Contribution of GWAS Loci in Familial Dyslipidemias. *PLoS Genet*  
376 2016;**12**(5):e1006078.
- 377 10. Stitzel NO, Peloso GM, Abifadel M, Cefalu AB, Fouchier S, Motazacker MM, Tada H,  
378 Larach DB, Awan Z, Haller JF, Pullinger CR, Varret M, Rabes JP, Noto D, Tarugi P, Kawashiri  
379 MA, Nohara A, Yamagishi M, Risman M, Deo R, Ruel I, Shendure J, Nickerson DA, Wilson  
380 JG, Rich SS, Gupta N, Farlow DN, Neale BM, Daly MJ, Kane JP, Freeman MW, Genest J,  
381 Rader DJ, Mabuchi H, Kastelein JJ, Hovingh GK, Aversa MR, Gabriel S, Boileau C, Kathiresan  
382 S. Exome sequencing in suspected monogenic dyslipidemias. *Circ Cardiovasc Genet*  
383 2015;**8**(2):343-50.
- 384 11. Brahm AJ, Hegele RA. Combined hyperlipidemia: familial but not (usually) monogenic.  
385 *Curr Opin Lipidol* 2016;**27**(2):131-40.
- 386 12. Lewis GF, Xiao C, Hegele RA. Hypertriglyceridemia in the genomic era: a new  
387 paradigm. *Endocr Rev* 2015;**36**(1):131-47.
- 388 13. Talmud PJ, Shah S, Whittall R, Futema M, Howard P, Cooper JA, Harrison SC, Li K,  
389 Drenos F, Karpe F, Neil HA, Descamps OS, Langenberg C, Lench N, Kivimaki M, Whittaker  
390 J, Hingorani AD, Kumari M, Humphries SE. Use of low-density lipoprotein cholesterol gene  
391 score to distinguish patients with polygenic and monogenic familial hypercholesterolaemia: a  
392 case-control study. *Lancet* 2013;**381**(9874):1293-301.

- 393 14. Sharifi M, Rakhit RD, Humphries SE, Nair D. Cardiovascular risk stratification in familial  
394 hypercholesterolaemia. *Heart* 2016;**102**(13):1003-1008.
- 395 15. Sharifi M, Higginson E, Bos S, Gallivan A, Harvey D, Li KW, Abeysekera A, Haddon A,  
396 Ashby H, Shipman KE, Cooper JA, Futema M, Roeters van Lennep JE, Sijbrands EJG, Labib  
397 M, Nair D, Humphries SE. Greater preclinical atherosclerosis in treated monogenic familial  
398 hypercholesterolemia vs. polygenic hypercholesterolemia. *Atherosclerosis* 2017;**263**:405-411.
- 399 16. Surma MA, Herzog R, Vasilj A, Klose C, Christinat N, Morin-Rivron D, Simons K,  
400 Masoodi M, Sampaio JL. An automated shotgun lipidomics platform for high throughput,  
401 comprehensive, and quantitative analysis of blood plasma intact lipids. *Eur J Lipid Sci Technol*  
402 2015;**117**(10):1540-1549.
- 403 17. Han X. Lipidomics for studying metabolism. *Nat Rev Endocrinol* 2016;**12**(11):668-679.
- 404 18. Simons K. How Can Omic Science be Improved? *Proteomics* 2018;**18**(5-6):e1800039.
- 405 19. Demirkan A, van Duijn CM, Ugocsai P, Isaacs A, Pramstaller PP, Liebisch G, Wilson  
406 JF, Johansson A, Rudan I, Aulchenko YS, Kirichenko AV, Janssens AC, Jansen RC, Gnewuch  
407 C, Domingues FS, Pattaro C, Wild SH, Jonasson I, Polasek O, Zorkoltseva IV, Hofman A,  
408 Karssen LC, Struchalin M, Floyd J, Igl W, Biloglav Z, Broer L, Pfeufer A, Pichler I, Campbell  
409 S, Zaboli G, Kolcic I, Rivadeneira F, Huffman J, Hastie ND, Uitterlinden A, Franke L, Franklin  
410 CS, Vitart V, Consortium D, Nelson CP, Preuss M, Consortium CA, Bis JC, O'Donnell CJ,  
411 Franceschini N, Consortium C, Witteman JC, Axenovich T, Oostra BA, Meitinger T, Hicks AA,  
412 Hayward C, Wright AF, Gyllenstein U, Campbell H, Schmitz G, consortium E. Genome-wide  
413 association study identifies novel loci associated with circulating phospho- and sphingolipid  
414 concentrations. *PLoS Genet* 2012;**8**(2):e1002490.
- 415 20. Alshehry ZH, Mundra PA, Barlow CK, Mellett NA, Wong G, McConville MJ, Simes J,  
416 Tonkin AM, Sullivan DR, Barnes EH, Nestel PJ, Kingwell BA, Marre M, Neal B, Poulter NR,  
417 Rodgers A, Williams B, Zoungas S, Hillis GS, Chalmers J, Woodward M, Meikle PJ. Plasma  
418 Lipidomic Profiles Improve on Traditional Risk Factors for the Prediction of Cardiovascular  
419 Events in Type 2 Diabetes Mellitus. *Circulation* 2016;**134**(21):1637-1650.
- 420 21. Stegeman C, Pechlaner R, Willeit P, Langley SR, Mangino M, Mayr U, Menni C,  
421 Moayyeri A, Santer P, Rungger G, Spector TD, Willeit J, Kiechl S, Mayr M. Lipidomics profiling  
422 and risk of cardiovascular disease in the prospective population-based Bruneck study.  
423 *Circulation* 2014;**129**(18):1821-31.
- 424 22. Laaksonen R, Ekroos K, Sysi-Aho M, Hilvo M, Vihervaara T, Kauhanen D, Suoniemi  
425 M, Hurme R, Marz W, Schrnagl H, Stojakovic T, Vlachopoulou E, Lokki ML, Nieminen MS,  
426 Klingenberg R, Matter CM, Hornemann T, Juni P, Rodondi N, Raber L, Windecker S, Gencer  
427 B, Pedersen ER, Tell GS, Nygard O, Mach F, Sinisalo J, Luscher TF. Plasma ceramides  
428 predict cardiovascular death in patients with stable coronary artery disease and acute coronary  
429 syndromes beyond LDL-cholesterol. *Eur Heart J* 2016;**37**(25):1967-76.
- 430 23. Laurila PP, Surakka I, Sarin AP, Yetukuri L, Hyotylainen T, Soderlund S, Naukkarinen  
431 J, Tang J, Kettunen J, Mirel DB, Soronen J, Lehtimaki T, Ruokonen A, Ehnholm C, Eriksson  
432 JG, Salomaa V, Jula A, Raitakari OT, Jarvelin MR, Palotie A, Peltonen L, Oresic M, Jauhiainen  
433 M, Taskinen MR, Ripatti S. Genomic, transcriptomic, and lipidomic profiling highlights the role  
434 of inflammation in individuals with low high-density lipoprotein cholesterol. *Arterioscler Thromb*  
435 *Vasc Biol* 2013;**33**(4):847-57.
- 436 24. Matyash V, Liebisch G, Kurzchalia TV, Shevchenko A, Schwudke D. Lipid extraction  
437 by methyl-tert-butyl ether for high-throughput lipidomics. *J Lipid Res* 2008;**49**(5):1137-46.
- 438 25. Herzog R, Schuhmann K, Schwudke D, Sampaio JL, Bornstein SR, Schroeder M,  
439 Shevchenko A. LipidXplorer: a software for consensual cross-platform lipidomics. *PLoS One*  
440 2012;**7**(1):e29851.
- 441 26. Herzog R, Schwudke D, Schuhmann K, Sampaio JL, Bornstein SR, Schroeder M,  
442 Shevchenko A. A novel informatics concept for high-throughput shotgun lipidomics based on  
443 the molecular fragmentation query language. *Genome Biol* 2011;**12**(1):R8.
- 444 27. Pirinen M, Donnelly P, Spencer CCA. Efficient computation with a linear mixed model  
445 on large-scale data sets with applications to genetic studies. *Ann Appl Stat* 2013;**7**(1):369-390.
- 446 28. R Core Team. R: A Language and Environment for Statistical Computing. In: R  
447 Foundation for Statistical Computing; 2014.



- 448 29. Voors-Pette C, de Bruin TW. Excess coronary heart disease in Familial Combined  
449 Hyperlipidemia, in relation to genetic factors and central obesity. *Atherosclerosis*  
450 2001;**157**(2):481-9.
- 451 30. Hegele RA, Ginsberg HN, Chapman MJ, Nordestgaard BG, Kuivenhoven JA, Averna  
452 M, Boren J, Bruckert E, Catapano AL, Descamps OS, Hovingh GK, Humphries SE, Kovanen  
453 PT, Masana L, Pajukanta P, Parhofer KG, Raal FJ, Ray KK, Santos RD, Stalenhoef AF, Stroes  
454 E, Taskinen MR, Tybjaerg-Hansen A, Watts GF, Wiklund O, European Atherosclerosis Society  
455 Consensus P. The polygenic nature of hypertriglyceridaemia: implications for definition,  
456 diagnosis, and management. *Lancet Diabetes Endocrinol* 2014;**2**(8):655-66.
- 457 31. Olivecrona G. Role of lipoprotein lipase in lipid metabolism. *Curr Opin Lipidol*  
458 2016;**27**(3):233-41.
- 459 32. Kobayashi J, Miyashita K, Nakajima K, Mabuchi H. Hepatic Lipase: a Comprehensive  
460 View of its Role on Plasma Lipid and Lipoprotein Metabolism. *J Atheroscler Thromb*  
461 2015;**22**(10):1001-11.
- 462 33. Masson D, Jiang X-C, Lagrost L, Tall AR. The role of plasma lipid transfer proteins in  
463 lipoprotein metabolism and atherogenesis. *J Lipid Res* 2009;**50**(Suppl):S201-S206.
- 464 34. Christinat N, Masoodi M. Comprehensive Lipoprotein Characterization Using  
465 Lipidomics Analysis of Human Plasma. *J Proteome Res* 2017;**16**(8):2947-2953.
- 466 35. Raatz SK, Bibus D, Thomas W, Kris-Etherton P. Total Fat Intake Modifies Plasma Fatty  
467 Acid Composition in Humans. *The Journal of Nutrition* 2001;**131**(2):231-234.
- 468 36. Tarasov K, Ekroos K, Suoniemi M, Kauhanen D, Sylvanne T, Hurme R, Gouni-Berthold  
469 I, Berthold HK, Kleber ME, Laaksonen R, Marz W. Molecular lipids identify cardiovascular risk  
470 and are efficiently lowered by simvastatin and PCSK9 deficiency. *J Clin Endocrinol Metab*  
471 2014;**99**(1):E45-52.
- 472 37. Havulinna AS, Sysi-Aho M, Hilvo M, Kauhanen D, Hurme R, Ekroos K, Salomaa V,  
473 Laaksonen R. Circulating Ceramides Predict Cardiovascular Outcomes in the Population-  
474 Based FINRISK 2002 Cohort. *Arterioscler Thromb Vasc Biol* 2016;**36**(12):2424-2430.
- 475 38. Bookstein L, Gidding SS, Donovan M, Smith FA. Day-to-day variability of serum  
476 cholesterol, triglyceride, and high-density lipoprotein cholesterol levels. Impact on the  
477 assessment of risk according to the National Cholesterol Education Program guidelines. *Arch*  
478 *Intern Med* 1990;**150**(8):1653-7.
- 479 39. Pereira MA, Weggemans RM, Jacobs JDR, Hannan PJ, Zock PL, Ordovas JM, Katan  
480 MB. Within-person variation in serum lipids: implications for clinical trials. *Int J Epidemiol*  
481 2004;**33**(3):534-541.
- 482 40. Jaskolowski J, Ritz C, Sjödin A, Astrup A, Szecsi PB, Stender S, Hjorth MF. Weekday  
483 variation in triglyceride concentrations in 1.8 million blood samples. *J Lipid Res*  
484 2017;**58**(6):1204-1213.
- 485 41. Nordestgaard BG, Langsted A, Mora S, Kolovou G, Baum H, Bruckert E, Watts GF,  
486 Sypniewska G, Wiklund O, Boren J, Chapman MJ, Cobbaert C, Descamps OS, von  
487 Eckardstein A, Kamstrup PR, Pulkki K, Kronenberg F, Remaley AT, Rifai N, Ros E, Langlois  
488 M, European Atherosclerosis S, the European Federation of Clinical C, Laboratory Medicine  
489 Joint Consensus I. Fasting Is Not Routinely Required for Determination of a Lipid Profile:  
490 Clinical and Laboratory Implications Including Flagging at Desirable Concentration Cutpoints-  
491 A Joint Consensus Statement from the European Atherosclerosis Society and European  
492 Federation of Clinical Chemistry and Laboratory Medicine. *Clin Chem* 2016;**62**(7):930-46.

493

494

495

496 **Tables**

497 **Table 1. Coronary artery disease risk in familial and population-ascertained hyperlipidemias.**

| <b>Hyperlipidemia type</b> | <b>Parameter</b>                                                       | <b>Hyperlipidemic families</b> | <b>Population cohort</b> | <b>Meta-analysis</b>  |
|----------------------------|------------------------------------------------------------------------|--------------------------------|--------------------------|-----------------------|
| <b>High LDL-C</b>          | <i>n</i> (hyperlipidemic / non-hyperlipidemic)                         | 625 (136/489)                  | 19,644 (2,175/17,469)    | 20,269 (2,311/17,958) |
|                            | Number of incident CAD diagnoses (hyperlipidemic / non-hyperlipidemic) | 45 (16/29)                     | 904 (176/728)            | 949 (192/757)         |
|                            | CAD HR (95% CI)                                                        | 1.71 (0.94-3.10)               | 1.74 (1.48-2.05)         | 1.74 (1.48-2.04)      |
| <b>High TGs</b>            | <i>n</i> (hyperlipidemic / non-hyperlipidemic)                         | 371 (72/299)                   | 19,644 (1,405/18,239)    | 20,015 (1,477/18,538) |
|                            | Number of incident CAD diagnoses (hyperlipidemic / non-hyperlipidemic) | 21 (3/18)                      | 904 (74/830)             | 925 (77/848)          |
|                            | CAD HR (95% CI)                                                        | 1.35 (0.52-3.51)               | 1.38 (1.08-1.75)         | 1.38 (1.09-1.74)      |

498

499 *Clinical incident CAD event endpoints were defined as either myocardial infarction or coronary revascularization.*

500 *Cox proportional hazards models, stratified by sex and clustered by family were used to estimate hazard ratios*

501 *(HR) for incident CAD events using age as the time scale and excluding individuals with prevalent CAD.*

502

503 **Figures and Figure Legends**

504 **Figure 1. Associations between high LDL-C status and the levels of 151 lipid species.**

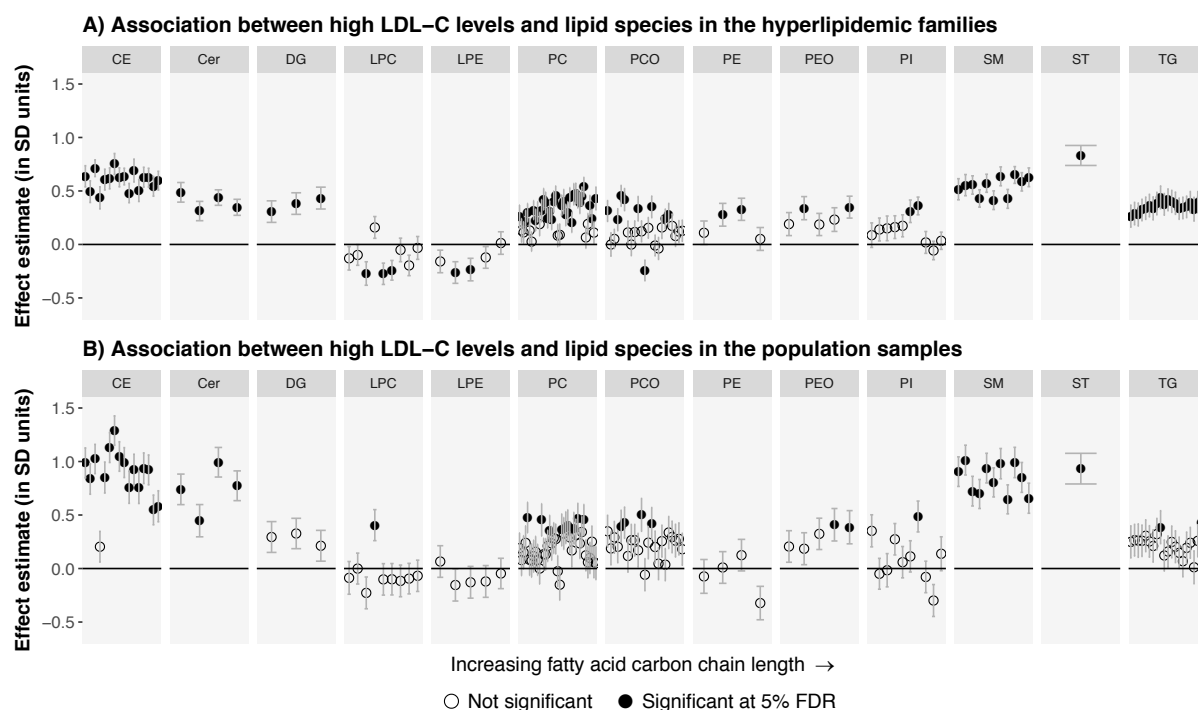

505

506 Panel A), individuals affected by high LDL-C levels ( $n=105$ ) were compared with their unaffected

507 relatives ( $n=358$ ) in the 53 “high LDL-C” families. Panel B), individuals affected by high LDL-C ( $n=56$ )

508 were compared with other individuals ( $n=841$ ) in the FINRISK population cohort. The association of

509 high LDL-C status with the lipid species was estimated using linear mixed models with age, age<sup>2</sup>, and

510 sex as the other fixed effect covariates. Statistical significance was evaluated using the Benjamini-

511 Hochberg method at a 5% false discovery rate (FDR). The ordering of the lipid species within each class

512 is the same as in Supplemental Table III. *Cer* = ceramide, *DG* = diacylglyceride, *LDL-C* = low-density

513 *lipoprotein cholesterol*, *LPA* = lysophosphatic acid, *LPC* = lysophosphatidylcholine, *LPE* =

514 *lysophosphatidylethanolamine*, *PC* = phosphatidylcholine, *PCO* = phosphatidylcholine-ether, *PE* =

515 *phosphatidylethanolamine*, *PEO* = phosphatidylethanolamine-ether, *PI* = phosphatidylinositol, *CE* =

516 *cholesteryl ester*; *SM* = sphingomyelin, *ST* = sterol, *TG* = triacylglyceride.

517

518 **Figure 2. Associations between high TG status and the levels of 151 lipid species.**

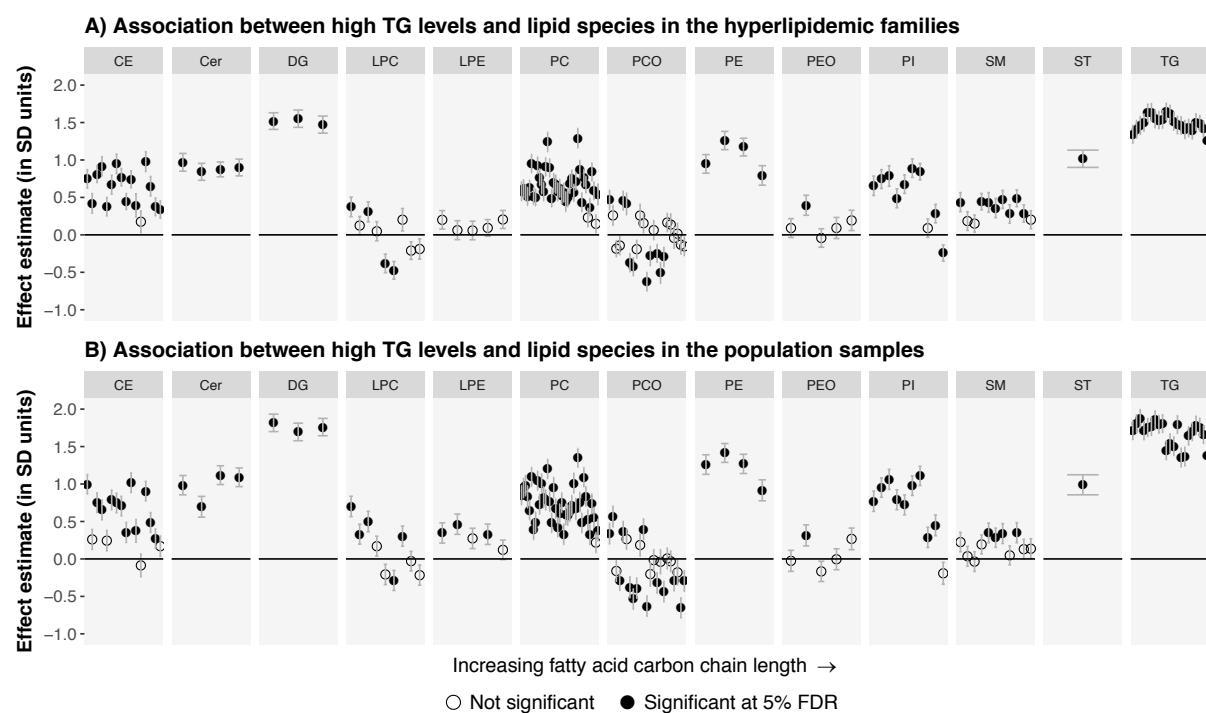

519

520 Panel A), individuals affected by high TGs ( $n=64$ ) were compared with their unaffected relatives  
521 ( $n=223$ ) in 39 “high TG” families. Panel B), individuals affected by high TGs ( $n=65$ ) were compared  
522 with other individuals ( $n=832$ ) in the FINRISK population cohort. The association analyses were  
523 performed similarly to Figure 1. Abbreviations are displayed in Figure 1 legend.

524

525 **Figure 3. Correlation of effect estimates for hyperlipidemia status between the hyperlipidemic**  
526 **families and the population samples.**

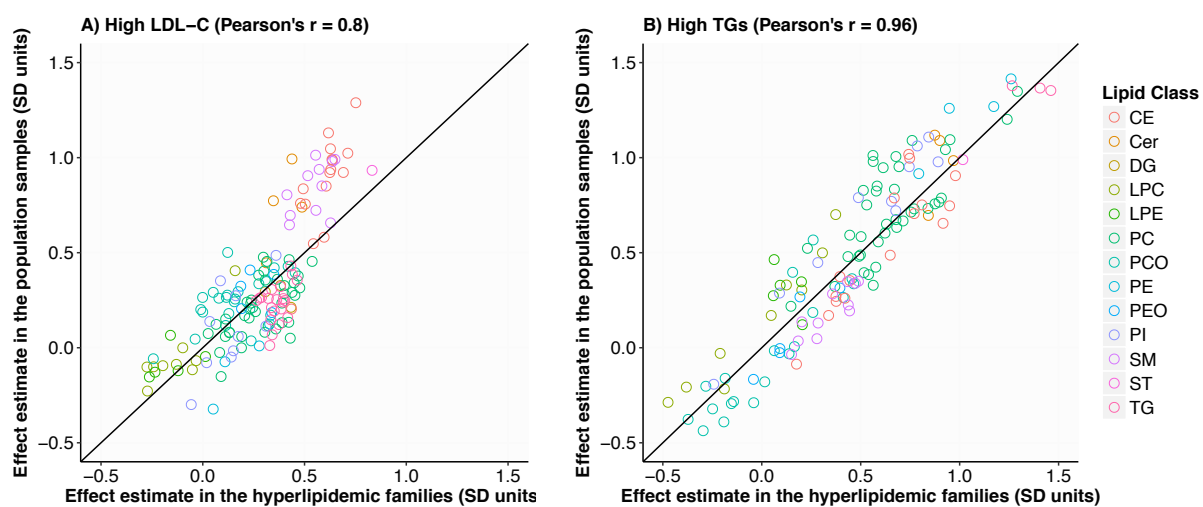

528 The correlation between the effect estimates observed in the family and population cohorts is presented  
529 in A) for high LDL-C (effect estimates presented in Figure 1) and B) for high TGs (effect estimates  
530 presented in Figure 2). Abbreviations are displayed in Figure 1 legend.

531

532 **Figure 4. Independent (co-adjusted) associations of LDL-C and TGs with 151 lipid species.**

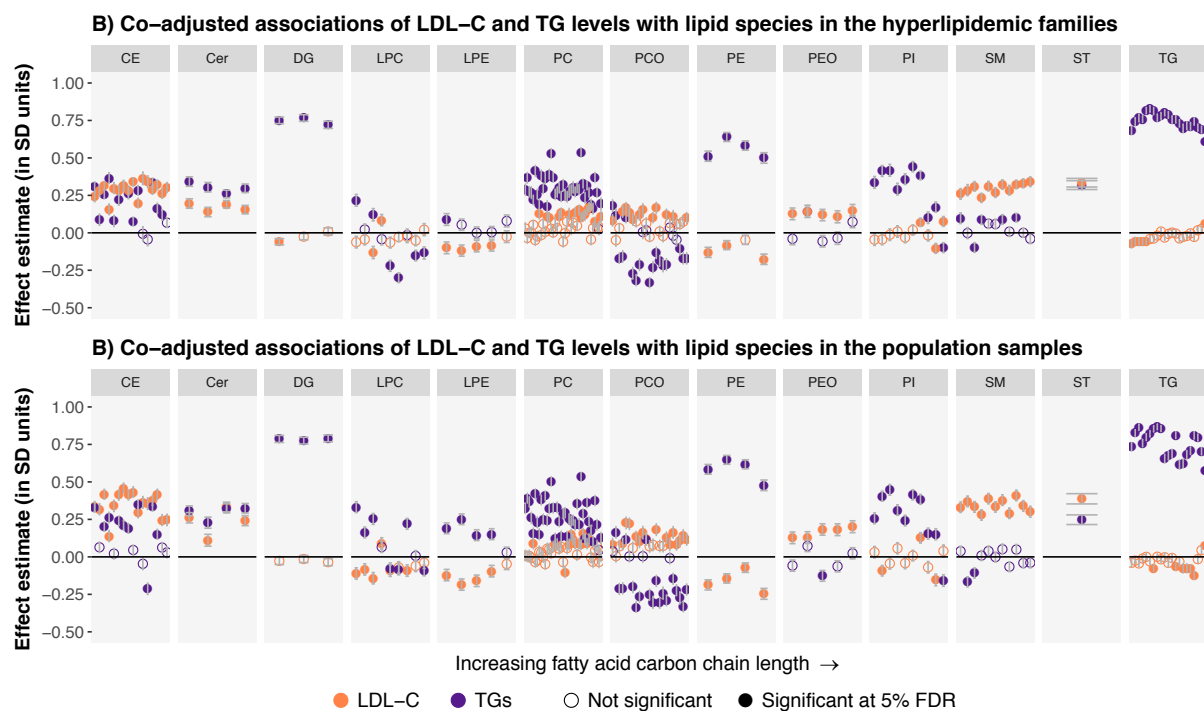

533

534 Effect estimates for LDL-C and TGs were derived from linear mixed models with the lipid species as  
535 outcomes, and LDL-C,  $\log(TGs)$ , age,  $age^2$ , and sex as fixed effect covariates. The effect estimates were  
536 derived separately in the hyperlipidemic families (Panel A,  $n = 550$  individuals) and the FINRISK  
537 population cohort (Panel B,  $n = 897$  individuals). Effect estimates are presented for LDL-C in orange  
538 and TGs in purple. Statistical significance was evaluated using the Benjamini-Hochberg method at a 5%  
539 false discovery rate (FDR). The ordering of the lipid species within each class is the same as in  
540 Supplemental Table III. Abbreviations are displayed in Figure 1 legend.
